# Supplementary material for: Successful Eradication of Porcine Epidemic Diarrhea in an Enzootically Infected Farm: A Two-Year Follow-Up Study
Source: MDPI journal article supplement (doi:10.3390/pathogens10070830), 2021-07-01
Supplement: s1 [file s1]

**Table S1.** Comparison of the full-length genome of KNU-1907 to the Korean G2b prototype KNU-141112 strain.

| Genome Region<br>(Nucleotide Length) | KNU-1907                                               |  |
|--------------------------------------|--------------------------------------------------------|--|
|                                      | % Identity (No. of nt or aa Differences) to KNU-141112 |  |
| 5'-UTR (292)                         | 99.6 (1)                                               |  |
| ORF1ab (20,345)                      | 99.7 (19)                                              |  |
| nsp1 (363)                           | 99.1 (1)                                               |  |
| nsp2 (2,322)                         | 99.8 (1)                                               |  |
| nsp3 (4,863)                         | 99.6 (6)                                               |  |
| nsp4 (1,443)                         | 99.3 (3)                                               |  |
| nsp5 (906)                           | 99.6 (1)                                               |  |
| nsp6 (840)                           | 100 (0)                                                |  |
| nsp7 (249)                           | 100 (0)                                                |  |
| nsp8 (585)                           | 100 (0)                                                |  |
| nsp9 (324)                           | 100 (0)                                                |  |
| nsp10 (405)                          | 100 (0)                                                |  |
| nsp11 (54)                           | 100 (0)                                                |  |
| nsp12 (2,781)                        | 99.6 (3)                                               |  |
| nsp13 (1,791)                        | 99.8 (1)                                               |  |
| nsp14 (1,551)                        | 99.6 (2)                                               |  |
| nsp15 (1,017)                        | 100 (0)                                                |  |
| nsp16 (906)                          | 99.6 (1)                                               |  |
| Spike (4,161)                        | 99.2 (11)                                              |  |
| ORF3 (675)                           | 99.5 (1)                                               |  |
| E (231)                              | 100 (0)                                                |  |
| M (681)                              | 100 (0)                                                |  |
| N (1,326)                            | 98.8 (5)                                               |  |
| 3'-UTR (334)                         | 99.4 (2)                                               |  |
| Total                                | 99.5 (1/36/2) <sup>a</sup>                             |  |

<sup>a</sup> The number of individual differences in the 5'-UTR, protein-coding region, and 3'-UTR, respectively.

**Table S2.** Comparison of the full-length genome among KNU-1907 strains.

| Genome Region<br>(Nucleotide Length) | KNU-1907-3                                           | KNU-1907-8 |
|--------------------------------------|------------------------------------------------------|------------|
|                                      | % Identity (No. of nt or aa Differences) to KNU-1907 |            |
| 5'-UTR (292)                         | 100 (0)                                              | 99.6 (1)   |
| ORF1ab (20,345)                      | 99.8 (10)                                            | 99.8 (11)  |
| nsp1 (363)                           | 100 (0)                                              | 100 (0)    |
| nsp2 (2,322)                         | 99.8 (1)                                             | 99.7 (2)   |
| nsp3 (4,863)                         | 99.9 (1)                                             | 99.9 (1)   |
| nsp4 (1,443)                         | 99.5 (2)                                             | 99.5 (2)   |
| nsp5 (906)                           | 99.6 (1)                                             | 99.6 (1)   |
| nsp6 (840)                           | 100 (0)                                              | 100 (0)    |
| nsp7 (249)                           | 100 (0)                                              | 100 (0)    |
| nsp8 (585)                           | 100 (0)                                              | 100 (0)    |
| nsp9 (324)                           | 100 (0)                                              | 100 (0)    |
| nsp10 (405)                          | 100 (0)                                              | 100 (0)    |
| nsp11 (54)                           | 100 (0)                                              | 100 (0)    |
| nsp12 (2,781)                        | 99.6 (3)                                             | 99.6 (3)   |
| nsp13 (1,791)                        | 100 (0)                                              | 100 (0)    |
| nsp14 (1,551)                        | 100 (0)                                              | 100 (0)    |
| nsp15 (1,017)                        | 99.4 (2)                                             | 99.4 (2)   |
| nsp16 (906)                          | 100 (0)                                              | 100 (0)    |
| Spike (4,161)                        | 99.7 (4)                                             | 99.3 (8)   |
| ORF3 (675)                           | 99.5 (1)                                             | 99.5 (1)   |
| E (231)                              | 100 (0)                                              | 100 (0)    |
| M (681)                              | 100 (0)                                              | 100 (0)    |
| N (1,326)                            | 99.7 (1)                                             | 99.3 (3)   |
| 3'-UTR (334)                         | 100 (0)                                              | 99.7 (1)   |

|                                                                                                                   |                            |                            |
|-------------------------------------------------------------------------------------------------------------------|----------------------------|----------------------------|
| Total                                                                                                             | 99.9 (0/16/0) <sup>a</sup> | 99.8 (1/23/1) <sup>a</sup> |
| <sup>a</sup> The number of individual differences in the 5'-UTR, protein-coding region, and 3'-UTR, respectively. |                            |                            |

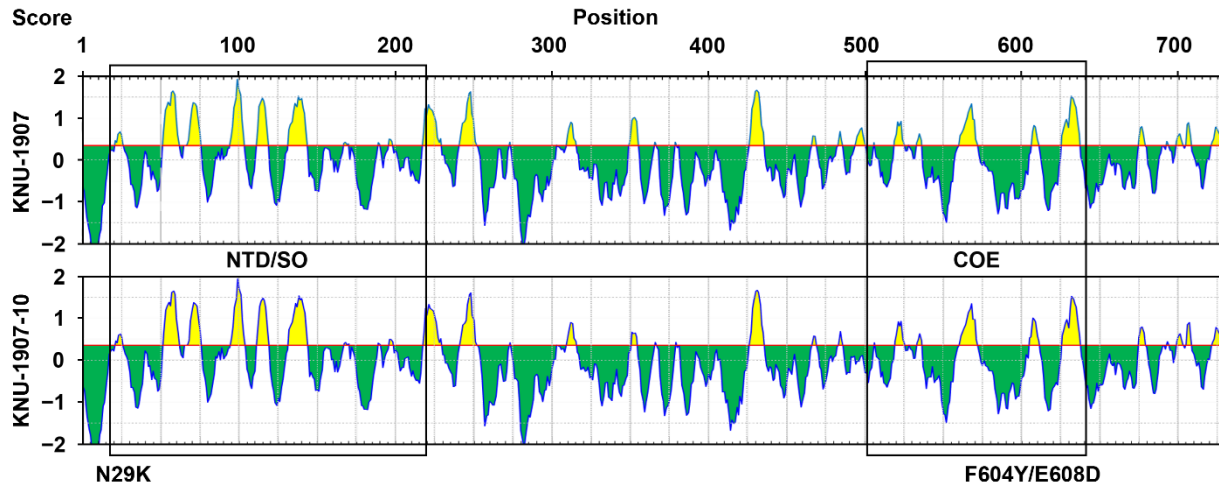

**Figure S1.** Comparison of Bepipred linear epitope prediction of the S proteins between the KNU-1907 (top) and KNU-1907-10 (bottom) strains. The regions with predicted epitopes on the protein are shown in yellow. Two NTD/SO and COE neutralizing epitope regions at positions 19-220 and 502-641, including one (N29K) and two (F604Y and E608D) amino acid changes between KNU-1907-10, respectively, are indicated by a solid box.

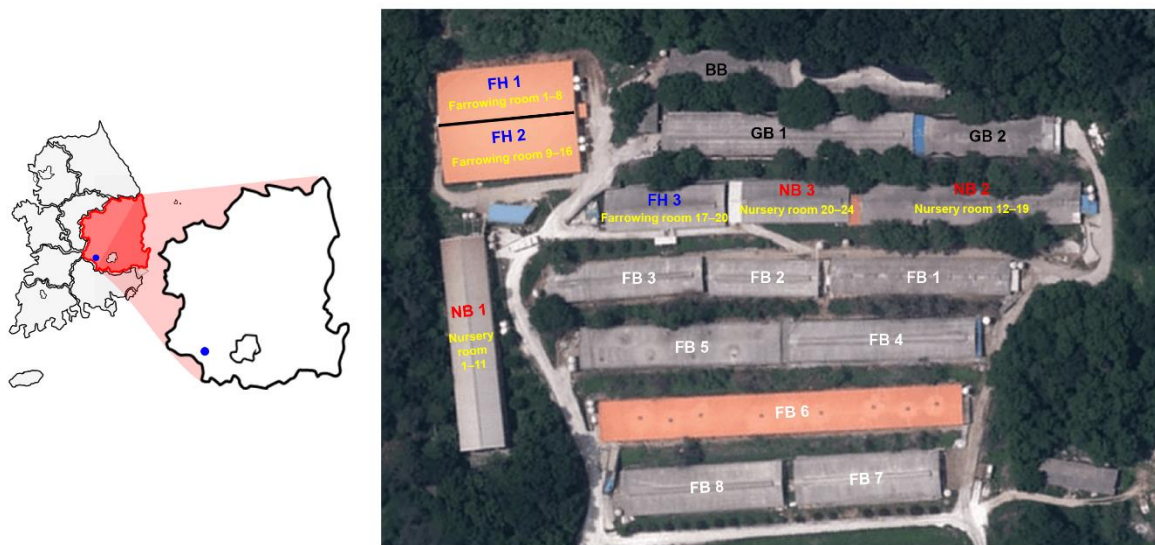

**Figure S2.** Geographic location and facility layout plan of the PEDV-infected farm analyzed in this study. A map of eight provinces in South Korea is shown on the left. The right is a magnified version of the Gyeongbuk Province in the picture on the left, and the location of the farm in this study is marked with a blue dot. The facility layout plan of the swine farm was drawn using the Google Map service (<http://www.google.co.kr>, accessed on 16 January 2021). The facility layout plan of the swine farm was drawn using the breeding barn (BB: black), two gestation barns (GB: black), three farrowing houses (FH: blue), three nursery barns (NB: red), and eight finisher barns (FB: white), FH 1, 2, and 3 containing farrowing room 1-8, 9-16, and 17-20, respectively, whereas NB 1, 2, and 3 contain nursery rooms 1-11, 12-19, and 20-24, respectively.
